# Supplementary material
Source: PubMed Central journal article supplement (PMC4340089)
Supplement: NIHMS659969-supplement-8.pdf [file NIHMS659969-supplement-8.pdf]

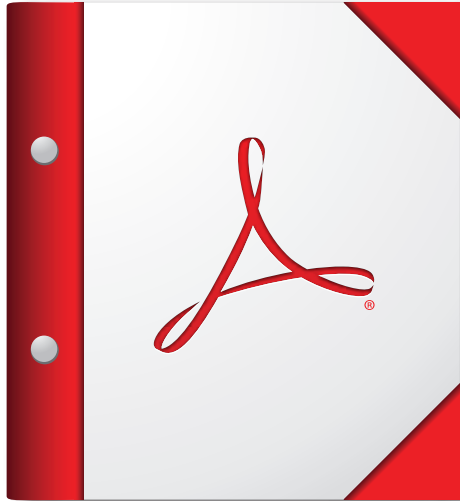

**For the best experience, open this PDF portfolio in  
Acrobat X or Adobe Reader X, or later.**

[Get Adobe Reader Now!](#)
